# Supplementary material
Source: PubMed Central journal article supplement (PMC4378178)
Supplement: supp_pp.15.00049_00049suppfig2.pdf [file supp_pp.15.00049_00049suppfig2.pdf]

Figure S2

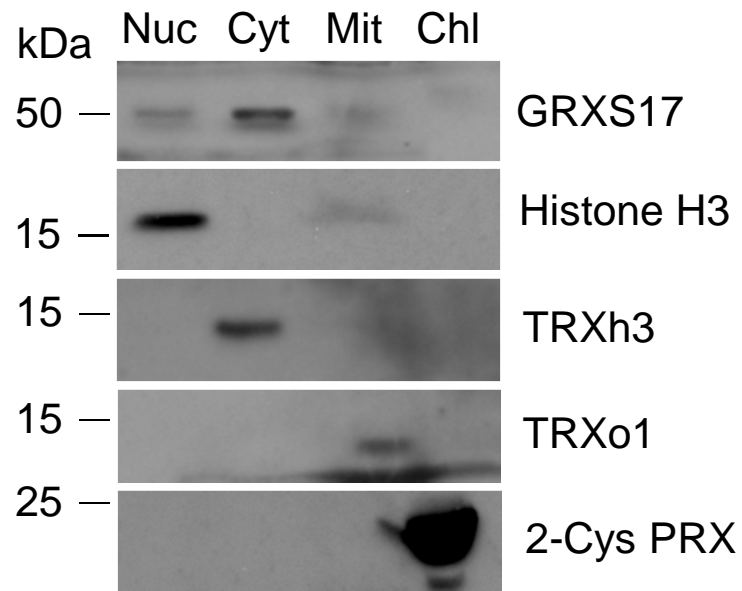

**Figure S2. Subcellular localization of GRXS17.**

Immunodetection of GRXS17, nuclear histone H3, cytosolic thioredoxin h3 (TRXh3), mitochondrial thioredoxin o1 (TRXo1) and plastidial 2-Cys peroxiredoxin (2-Cys PRX) in nuclear (Nuc), cytosolic (Cyt), mitochondrial (Mit) and chloroplastic (Chl) fractions prepared from Arabidopsis plants. The faint histone H3 band detected in mitochondrial fraction probably indicates a slight contamination from nuclei.
