# Supplementary material
Source: PubMed Central journal article supplement (PMC4378178)
Supplement: supp_pp.15.00049_00049suppfig4.pdf [file supp_pp.15.00049_00049suppfig4.pdf]

Figure S4

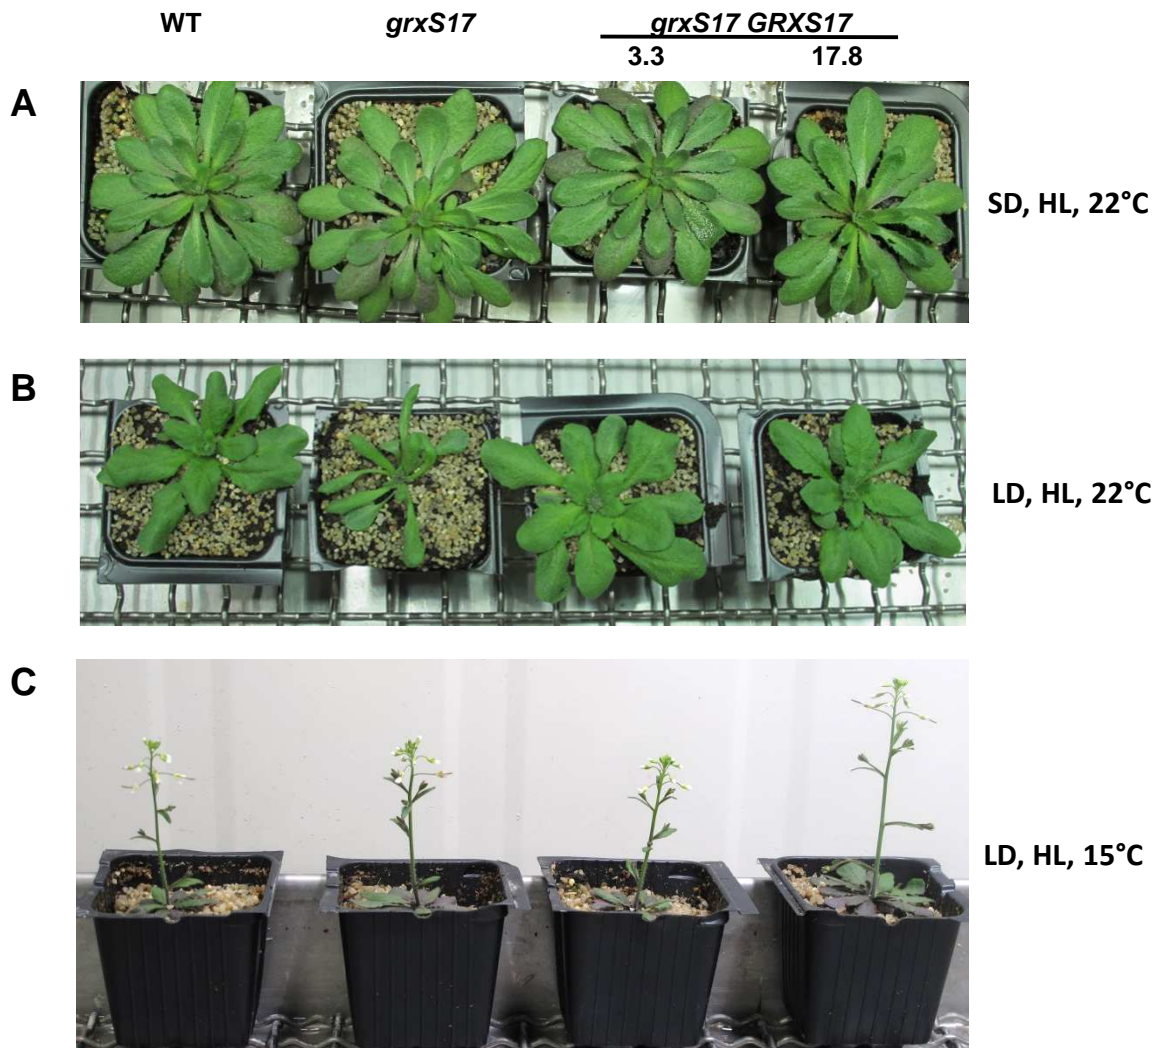

**Figure S4. Growth and development of *A. thaliana* plants modified in *GRXS17* expression as a function of light and temperature regimes.**

(A) Five-week old plants grown for 2 weeks in standard conditions and then transferred for 3 weeks to high-light (500  $\mu\text{mol photons.m}^{-2}.\text{s}^{-1}$ ) and short-day (8-h photoperiod) conditions at 22°C. (B) Three-week old plants grown in high-light (500  $\mu\text{mol photons.m}^{-2}.\text{s}^{-1}$ ) and long-day (16-h photoperiod) conditions at 22°C. (C) Seven-week old plants grown for 3 weeks in standard conditions and then transferred to 15°C, long-day photoperiod (16 h) and high-light conditions (500  $\mu\text{mol photons.m}^{-2}.\text{s}^{-1}$ ) for 4 weeks. WT, wild-type plants; *grxS17*, homozygous SALK\_021301 plants; *grxS17 GRXS17* 3.3 and 17.8, two independent KO lines expressing *GRXS17*.
