# Supplementary material
Source: PubMed Central journal article supplement (PMC4378178)
Supplement: supp_pp.15.00049_00049suppfig5.pdf [file supp_pp.15.00049_00049suppfig5.pdf]

Figure S5

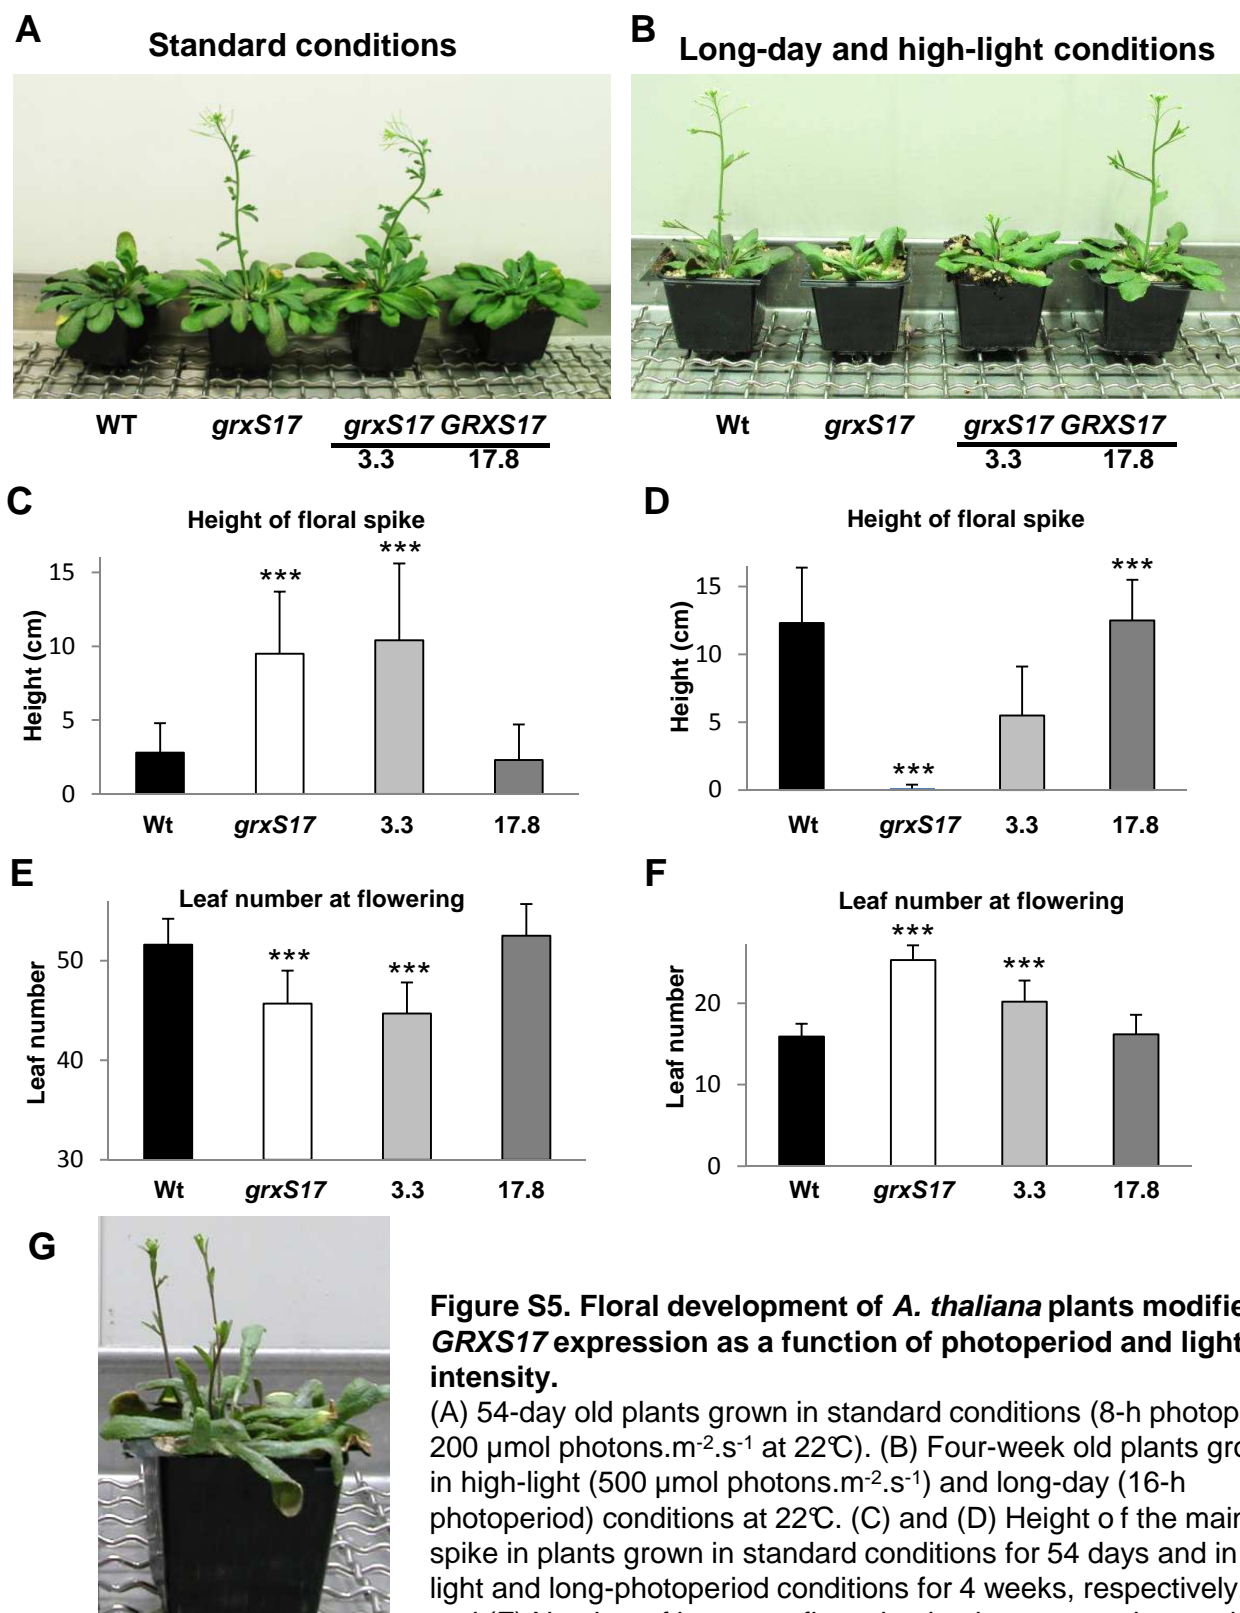

**Figure S5. Floral development of *A. thaliana* plants modified in *GRXS17* expression as a function of photoperiod and light intensity.**

(A) 54-day old plants grown in standard conditions (8-h photoperiod, 200  $\mu\text{mol photons}\cdot\text{m}^{-2}\cdot\text{s}^{-1}$  at 22°C). (B) Four-week old plants grown in high-light (500  $\mu\text{mol photons}\cdot\text{m}^{-2}\cdot\text{s}^{-1}$ ) and long-day (16-h photoperiod) conditions at 22°C. (C) and (D) Height of the main floral spike in plants grown in standard conditions for 54 days and in high-light and long-photoperiod conditions for 4 weeks, respectively. (E) and (F) Number of leaves at flowering in plants grown in standard conditions and in high-light and long-day conditions, respectively. (G) Five-week old *grxS17* plant grown in high-light (500  $\mu\text{mol photons}\cdot\text{m}^{-2}\cdot\text{s}^{-1}$ ) and long-day (16-h photoperiod) conditions at 22°C. WT, Wild-type plants; *grxS17*, homozygous SALK\_021301 plants; *grxS17 GRXS17* 3.3 and 17.8, two independent KO lines expressing *GRXS17*. \*\*\*, significantly different from the WT value with  $p < 0.01$  (t test).
