# Supplementary material
Source: PubMed Central journal article supplement (PMC4378178)
Supplement: supp_pp.15.00049_00049suppfig8.pdf [file supp_pp.15.00049_00049suppfig8.pdf]

Figure S8

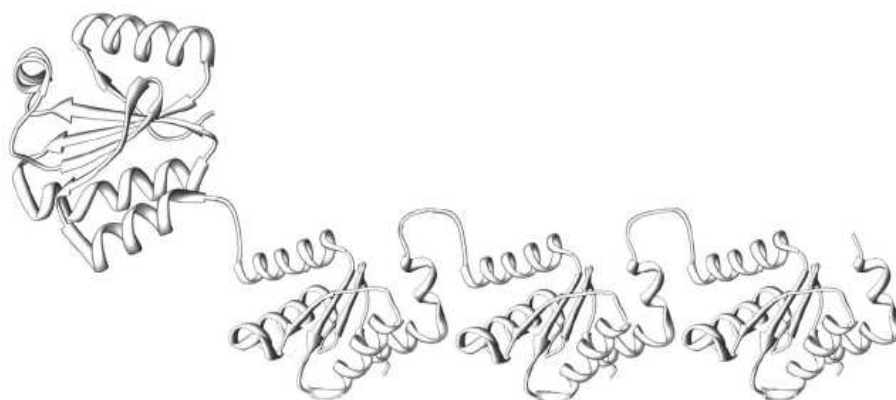

```

M2  MLFMKGIPEEPCGFSRKVVDILKEVNVDFGSFDILSDNEVREGLKKFSNWPTFPQLYCN  226
M3  MLFMKGRPEEPKCGFSGKVVEILNQEKIEFGSFDILLDDEVQRQLKVYSNWSSYPQLYVK  356
M4  MLFMKGPDEPKCGFSSKVVKALRGENVSFGSFDILTDEEVRQGIKNFSNWPTFPQLYYK  463
***** *:***:***** ***. * . :.:***** *:***:*** :***. :.:***** :
M2  GELGGADIAIAMHESGELKDAFKD  251
M3  GELMGGSDIVLEMQKSGELKKVLTE  381
M4  GELIGGCDIIMELSESGDLKATLSE  488
***:***.*** : : :***:*** .:.:

```

**Figure S8. Hypothetical structure of GRXS17 and amino acid alignment of the three GRX domains M2, M3 and M4 from *A. thaliana*.** The structures of the single domains were generated from 1XFL and 3L4N pdb entries for TRX and GRX proteins, respectively, and are not experimentally confirmed. The linker regions and the relative positions of the TRX domain are speculative.
