# Supplementary material
Source: PubMed Central journal article supplement (PMC4378178)
Supplement: supp_pp.15.00049_00049suppfig10.pdf [file supp_pp.15.00049_00049suppfig10.pdf]

Figure S10

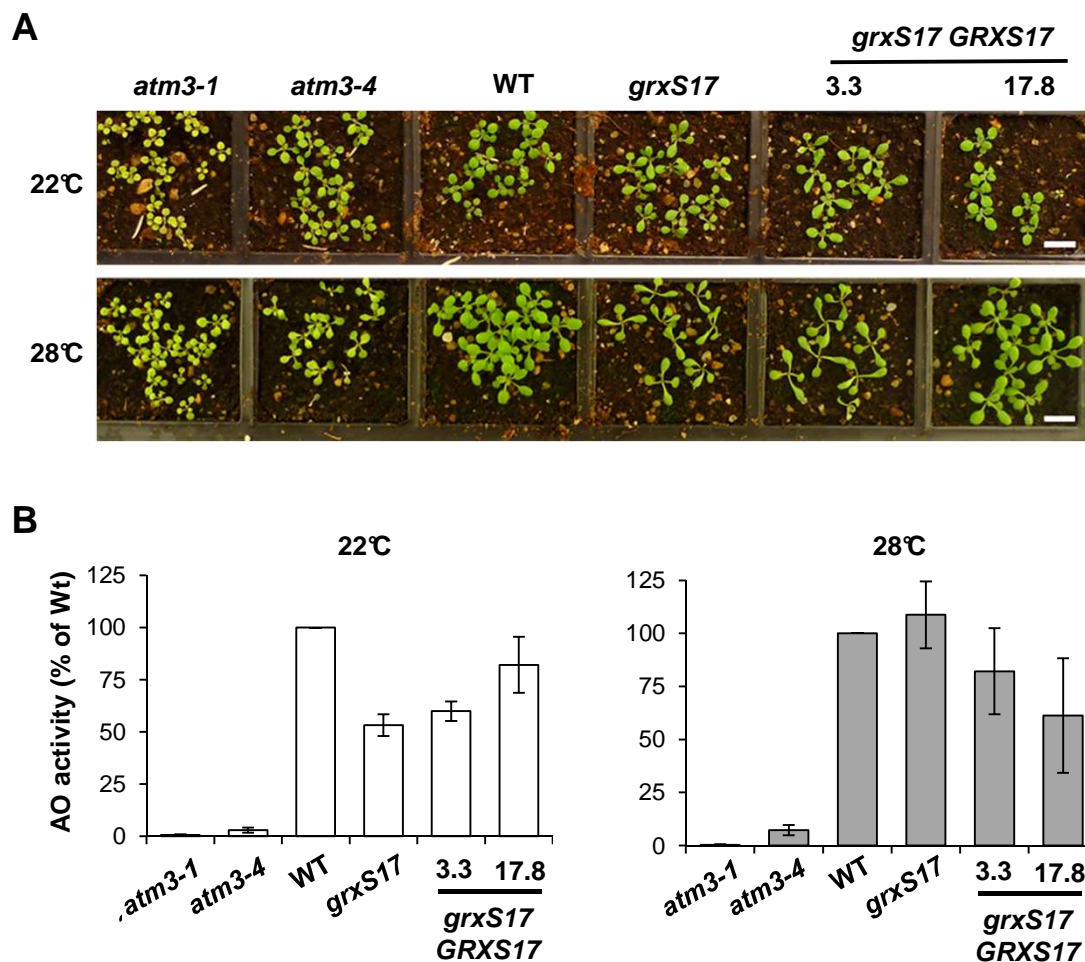

**Figure S10. Growth phenotypes and quantification of aldehyde oxidase enzyme activity in plants modified in *GRXS17* expression.** *grxS17* knockout seedlings were grown under normal and heat stress conditions and compared to complemented lines (3.3 and 17.8) and wild type (WT). For comparison, a weak (*atm3-4*) and a strong mutant allele (*atm3-1*) of *ATM3* were analysed, which are known to have decreased activities of cytosolic Fe-S enzymes. Plants were grown in long photoperiod (16 h) at 22°C for 14 days (white bars), or shifted to 28°C after 7 days (grey bars). (A) Images of *grxS17* mutants and controls grown under standard conditions and under heat stress. Scale bar = 1 cm. (B) Quantification of the band intensities in native gels (Fig. 7) reflecting the major aldehyde oxidase activity using ImageJ. Activities are shown as percentage of WT levels (mean  $\pm$  SD; n = 3).
