# Supplementary material
Source: PubMed Central journal article supplement (PMC4378178)
Supplement: supp_pp.15.00049_00049suppfig11.pdf [file supp_pp.15.00049_00049suppfig11.pdf]

Figure S11

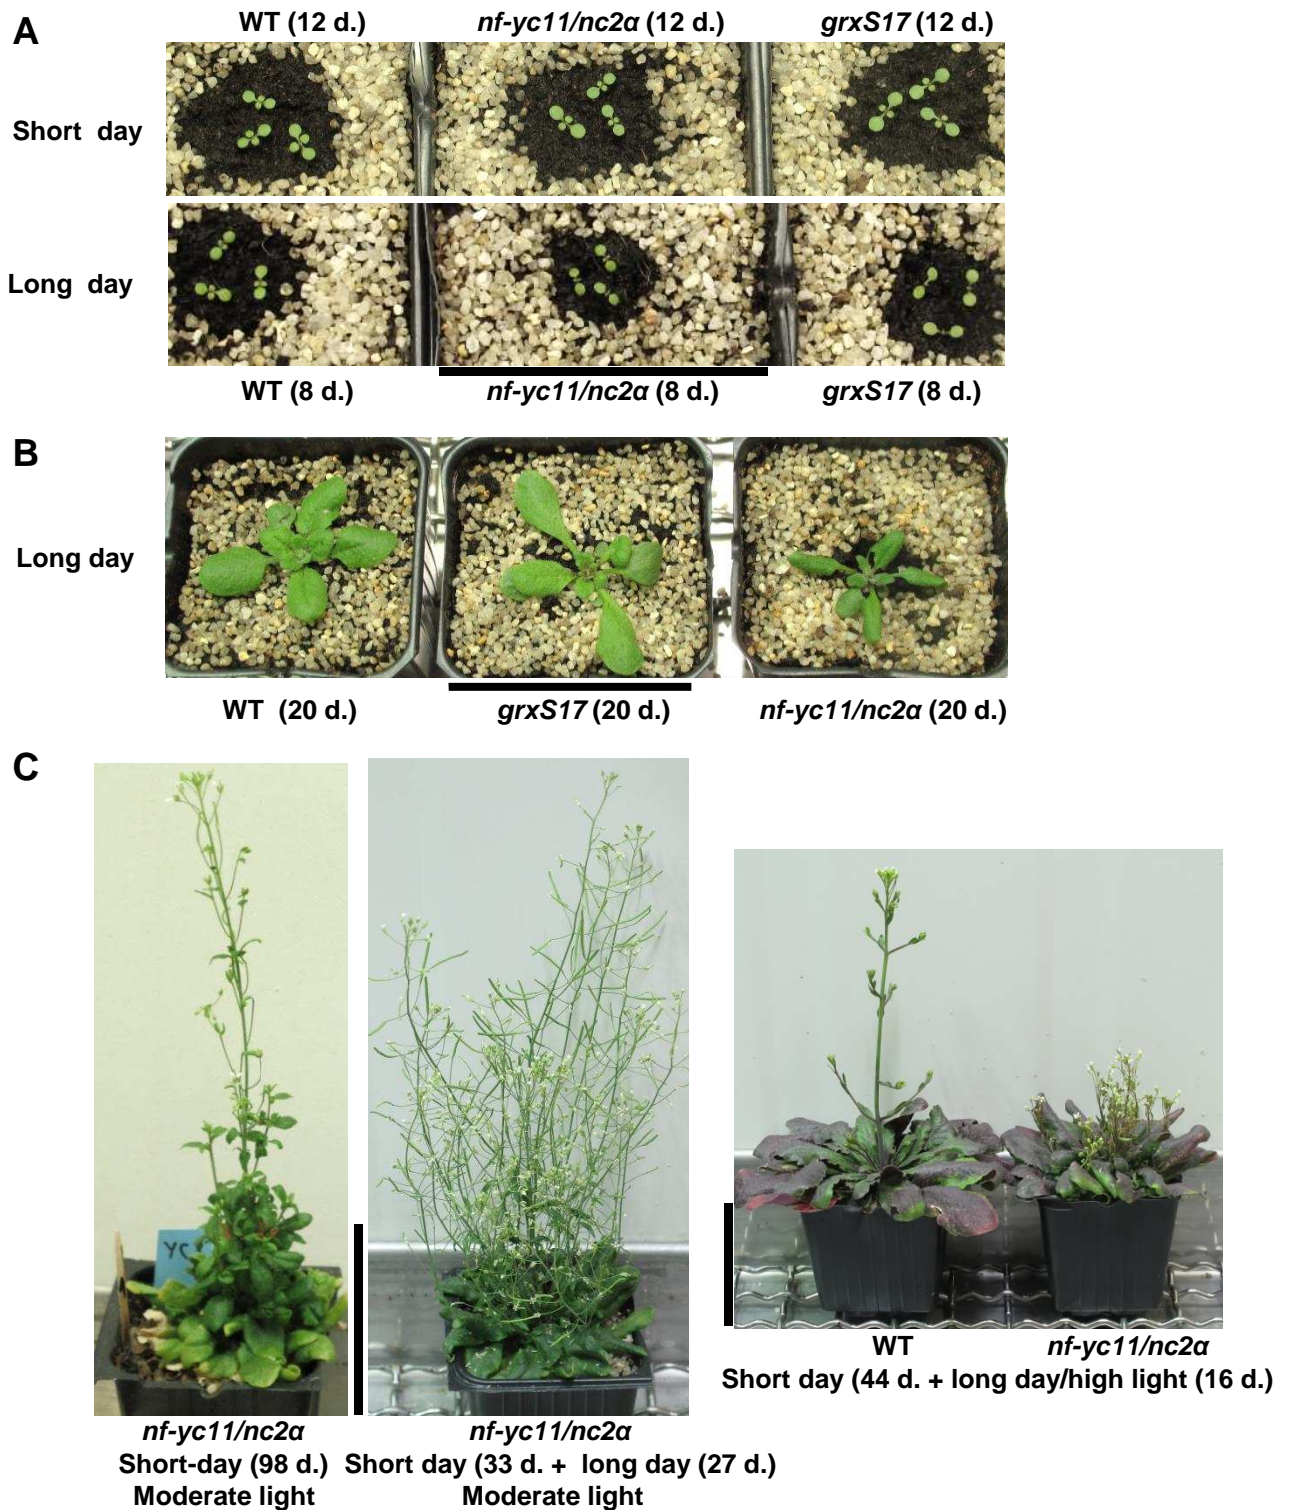

**Figure S11. Development of *nf-yc11/nc2a* plants as a function of light environment**

(A) Development of seedlings in short- and long-day conditions (8-h and 16-h, respectively) at moderate light ( $200 \mu\text{mol photons} \cdot \text{m}^{-2} \cdot \text{s}^{-1}$ ) and  $22^\circ\text{C}$ . (B) Phenotype of plants grown in long-day (16 h photoperiod) and moderate light ( $200 \mu\text{mol photons} \cdot \text{m}^{-2} \cdot \text{s}^{-1}$ ) conditions at  $22^\circ\text{C}$ . (C) Reproductive development of *nf-yc11/nc2a* plants in short- or long-day conditions at moderate or high light ( $200$  or  $500 \mu\text{mol photons} \cdot \text{m}^{-2} \cdot \text{s}^{-1}$ , respectively) and  $22^\circ\text{C}$ . Scale bars: 6 cm. The plant age and culture condition are indicated for each genotype.
