# Supplementary material
Source: PubMed Central journal article supplement (PMC4378178)
Supplement: supp_pp.15.00049_00049Table_S1_final.pdf [file supp_pp.15.00049_00049Table_S1_final.pdf]

**Table S1. List of primers employed in this study.**

| <b>Name</b>       | <b>Primers</b>                      | <b>Characteristics</b>                                                                         | <b>Organism</b> |
|-------------------|-------------------------------------|------------------------------------------------------------------------------------------------|-----------------|
| MMO 1285          | AAACAGCGGCCGCATTATTCATGAAAGGTATTCCT | Upstream oligo for cloning M2 module of <i>AtGRXS17</i> in pMM221. Contains NotI site          | Yeast           |
| MMO 1286          | AAACTGCAGAAGATCTTTGAAAGCATCTTT      | Downstream oligo for cloning M2 module of <i>AtGRXS17</i> in pMM221. Contains PstI site        | Yeast           |
| MMO 1287          | AAACAGCGGCCGCACTGTTCATGAAAGGAAGAC   | Upstream oligo for cloning M3 module of <i>AtGRXS17</i> in pMM221. Contains NotI site          | Yeast           |
| MMO 1288          | AAACTGCAGCCCTTCTCGGTCAAGAC          | Downstream oligo for cloning M3 module of <i>AtGRXS17</i> in pMM221. Contains PstI site        | Yeast           |
| MMO 1289          | AAACAGCGGCCGCACTATTCATGAAAGGTTCAAC  | Upstream oligo for cloning M4 module of <i>AtGRXS17</i> in pMM221. Contains NotI site          | Yeast           |
| MMO 1290          | AAACTGCAGCTCGGATAGAGTTGCTTTG        | Downstream oligo for cloning M4/entire module of <i>AtGRXS17</i> in pMM221. Contains PstI site | Yeast           |
| MMO 1291          | AAACAGCGGCCGCAAGCGGTACGGTGAAGGAT    | Upstream oligo for cloning the entire <i>AtGRXS17</i> in pMM221. Contains NotI site            | Yeast           |
| At4g04950 F       | CCCCATGAGCGGTACGGTGAAGGAT           | Forward primer for cloning <i>AtGRXS17</i> and PCR analysis                                    | Arabidopsis     |
| At4g04950 R       | CCCCGGATCTTACTCGGATAGAGTTGC         | Reverse primer for cloning <i>AtGRXS17</i> and PCR analysis                                    | Arabidopsis     |
| At4g04950 Rec-F   | GGGAATCCATATGAGCGGTACGGTGAAGG       | Forward primer for cloning <i>AtGRXS17</i> in pET-16b expression vector                        | Arabidopsis     |
| At4g04950 Rec-R   | CGGGATCCTTACTCGGATAGAGTTGCTTTG      | Reverse primer for cloning <i>AtGRXS17</i> in pET-16b expression vector                        | Arabidopsis     |
| At4g04950 C33S F  | CTTCTGGGCTTCTGGAGTGATGCTTCGAAGCA    | Forward primer for site-directed mutagenesis (Cys-33 to Ser)                                   | Arabidopsis     |
| At4g04950 C33S R  | TGCTTCGAAGCATCACTCCAAGAAGCCCAGAAG   | Reverse primer for site-directed mutagenesis (Cys-33 to Ser)                                   | Arabidopsis     |
| At4g04950 C179S F | CCTGAAGAGCCTAGGAGTGGGTTTAGCAGGA     | Forward primer for site-directed mutagenesis (Cys-179 to Ser)                                  | Arabidopsis     |
| At4g04950 C179S R | TCCTGCTAAACCCACTCCTAGGCTCTTCAGG     | Reverse primer for site-directed mutagenesis (Cys-179 to Ser)                                  | Arabidopsis     |
| At4g04950 C309S F | GACCAGAAGAACCAAGAGTGGGTTCAAGTGGGAAA | Forward primer for site-directed mutagenesis (Cys-309 to Ser)                                  | Arabidopsis     |
| At4g04950 C309S R | TTTCCCACTGAACCCACTCTTGGTTCTTCTGGTC  | Reverse primer for site-directed mutagenesis (Cys-309 to Ser)                                  | Arabidopsis     |
| At4g04950 C416S F | GGTTCACCAGATGAACCGAAAAGCGGATTTAGCT  | Forward primer for site-directed mutagenesis (Cys-416 to Ser)                                  | Arabidopsis     |
| At4g04950 C416S R | AGCTAAATCCGCTTTTCGGTTCATCTGGTGAACC  | Reverse primer for site-directed mutagenesis (Cys-416 to Ser)                                  | Arabidopsis     |
| At5g09810 F       | AAAATGGCCGATGGTGAGGATAT             | Forward primer for PCR analysis (Actin control)                                                | Arabidopsis     |
| At5g09810 R       | CAATACCGTTGTACGACCACT               | Reverse primer for PCR analysis (Actin control)                                                | Arabidopsis     |
| At3g12480 F2      | TCGACGATTTCTGGATTTGG                | Forward primer for PCR and RT-PCR analyses ( <i>AtNF-YC11/NC2α</i> )                           | Arabidopsis     |
| At3g12480 R2      | CCTTCTCTTGAGATGCTGC                 | Reverse primer for PCR and RT-PCR analyses ( <i>AtNF-YC11/NC2α</i> )                           | Arabidopsis     |
