# Supplementary material
Source: PubMed Central journal article supplement (PMC4378178)
Supplement: supp_pp.15.00049_00049Table_S3_final.pdf [file supp_pp.15.00049_00049Table_S3_final.pdf]

**Table S3. Baker's yeast strains.**

| <b>Strains</b> | <b>Relevant phenotype</b>                              | <b>Comments</b>                           |
|----------------|--------------------------------------------------------|-------------------------------------------|
| W303-1A        | <i>MATa ura3-1 ade2-1 leu2-3,112 trp1-1 his3-11,15</i> | Wild type                                 |
| W303-1B        | As W303-1A but <i>MATa</i>                             | Wild type                                 |
| MML100         | <i>MATa grx5::kanMX4</i>                               | Rodríguez-Manzanaque <i>et al.</i> (2002) |
| MML240         | <i>MATa grx5::kanMX4 [pMM54(GRX5-3HA)]::LEU2</i>       | Rodríguez-Manzanaque <i>et al.</i> (2002) |
| MML289         | <i>MATa grx5::kanMX4</i>                               | As MML100, but derived from W303-1B       |
| MML1268        | <i>MATa [pMM997(GrxS17-3HA)]::LEU2</i>                 | Integration of linear pMM997 in W303-1A   |
| MML1272        | <i>MATa [pMM993(GrxS17-3HA)]::LEU2</i>                 | Integration of linear pMM993 in W303-1A   |
| MML1274        | <i>MATa [pMM994(GrxS17-3HA)]::LEU2</i>                 | Integration of linear pMM994 in W303-1A   |
| MML1276        | <i>MATa [pMM998(GrxS17-3HA)]::LEU2</i>                 | Integration of linear pMM998 in W303-1A   |
| MML1280        | <i>MATa grx5::kanMX4 [pMM993(GrxS17-3HA)]::LEU2</i>    | Spore from a cross MML 289 x MML1272      |
| MML1282        | <i>MATa grx5::kanMX4 [pMM994(GrxS17-3HA)]::LEU2</i>    | Spore from a cross MML 289 x MML1274      |
| MML1288        | <i>MATa grx5::kanMX4 [pMM997(GrxS17-3HA)]::LEU2</i>    | Spore from a cross MML 289 x MML1268      |
| MML1290        | <i>MATa grx5::kanMX4 [pMM998(GrxS17-3HA)]::LEU2</i>    | Spore from a cross MML 289 x MML1276      |
